# Supplementary material for: Exportin 1 modulates life span by regulating nucleolar dynamics via the autophagy protein LGG-1/GABARAP
Source: PubMed Central journal article supplement (PMC10938577; doi:10.1126/sciadv.abj1604), 2022-04-01
Supplement: sciadv.abj1604_sm.pdf [file sciadv.abj1604_sm.pdf]

Supplementary Materials for  
**Exportin 1 modulates life span by regulating nucleolar dynamics via the  
autophagy protein LGG-1/GABARAP**

Anita V. Kumar, Taewook Kang, Tara G. Thakurta, Celeste Ng, Aric N. Rogers,  
Martin R. Larsen, Louis R. Lapierre\*

\*Corresponding author. Email: [louis\\_lapierre@brown.edu](mailto:louis_lapierre@brown.edu)

Published 1 April 2022, *Sci. Adv.* **8**, eabj1604 (2022)  
DOI: [10.1126/sciadv.abj1604](https://doi.org/10.1126/sciadv.abj1604)

**The PDF file includes:**

Figs. S1 to S5  
Tables S1 to S4  
Legends for data files S1 to S4  
References

**Other Supplementary Material for this manuscript includes the following:**

Data files S1 to S4

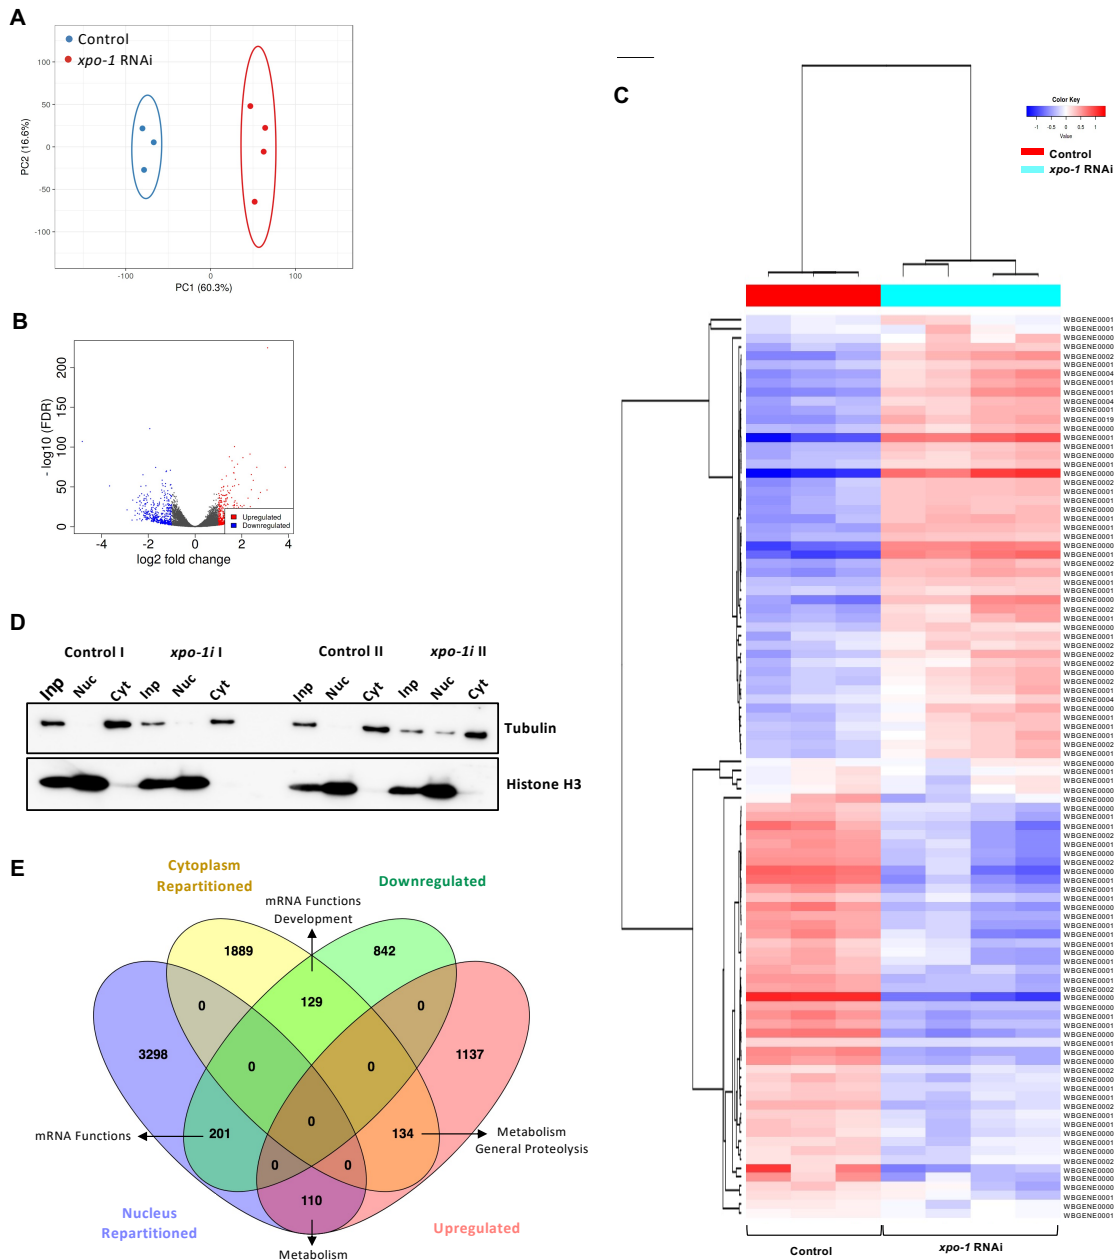

**Fig. S1. Transcriptomic and subcellular proteomic analyses of *xpo-1* inhibited nematodes**

(A) Principal component analysis for biological replicate samples used for RNA-seq prepared using ClustaVis tool. (B) Volcano plot depicting significantly up- and down-regulated genes in *xpo-1* RNAi compared to control prepared in iDEP .91. (C) Heatmap of top 100 differentially regulated genes obtained in *xpo-1* RNAi compared to control prepared using iDEP .91. (D) Histone H3 and Tubulin as markers for nuclear and non-nuclear (cytoplasmic) fractions, respectively, of input (Imp), nucleus (Nuc), and cytoplasm (Cyt) samples used for TMT-MS proteomics. (E) Venn diagram of overlapping hits from transcriptomics and proteomics datasets prepared using Venny 2.1 depicting enriched GO categories obtained using WormCat.

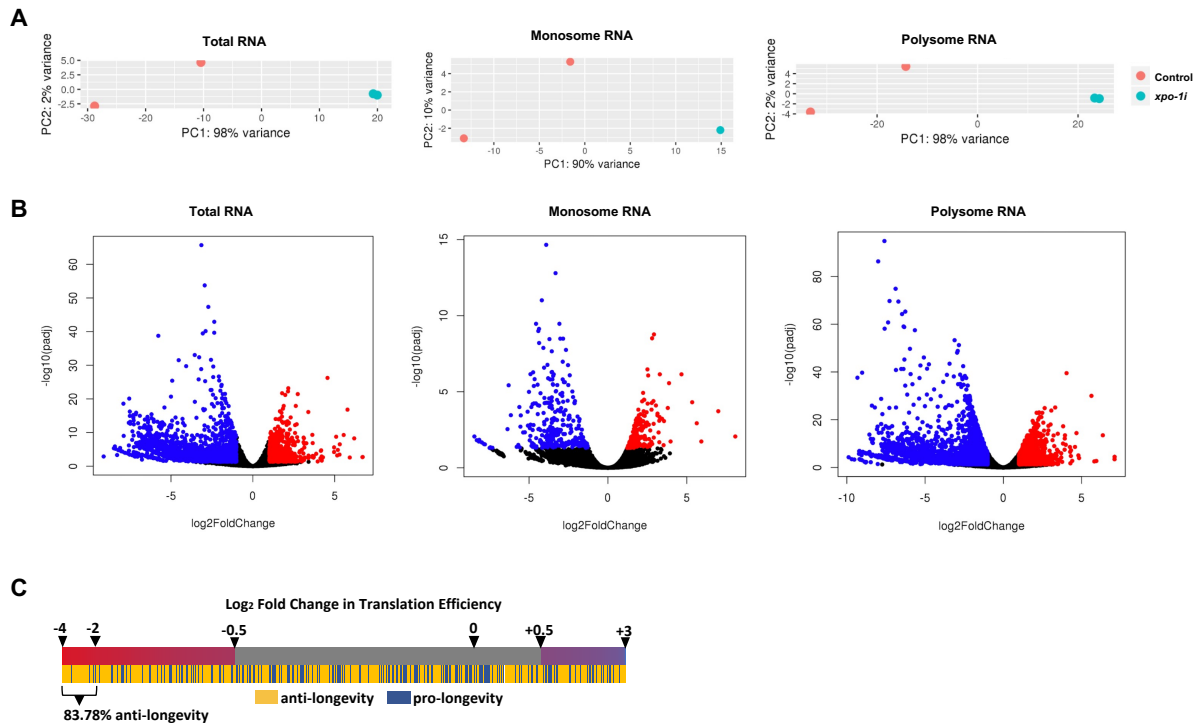

**Fig. S2. mRNA sequencing analysis from total, monosome, and polysome fractions from *xpo-1* inhibited animals**

(A) Principal component analyses for total, monosome, and polysome RNA samples used for RNA-seq. (B) Volcano plots representing up- and down-regulated genes obtained in total, monosome, and polysome RNA from *xpo-1* RNAi samples compared to control. (C) Heatmap representation of proteins with altered translation efficiency that also have a known role in longevity as per the GenAge database. The percentage of anti-longevity genes identified in our dataset of highly decreased  $\log_2$  TE is indicated.

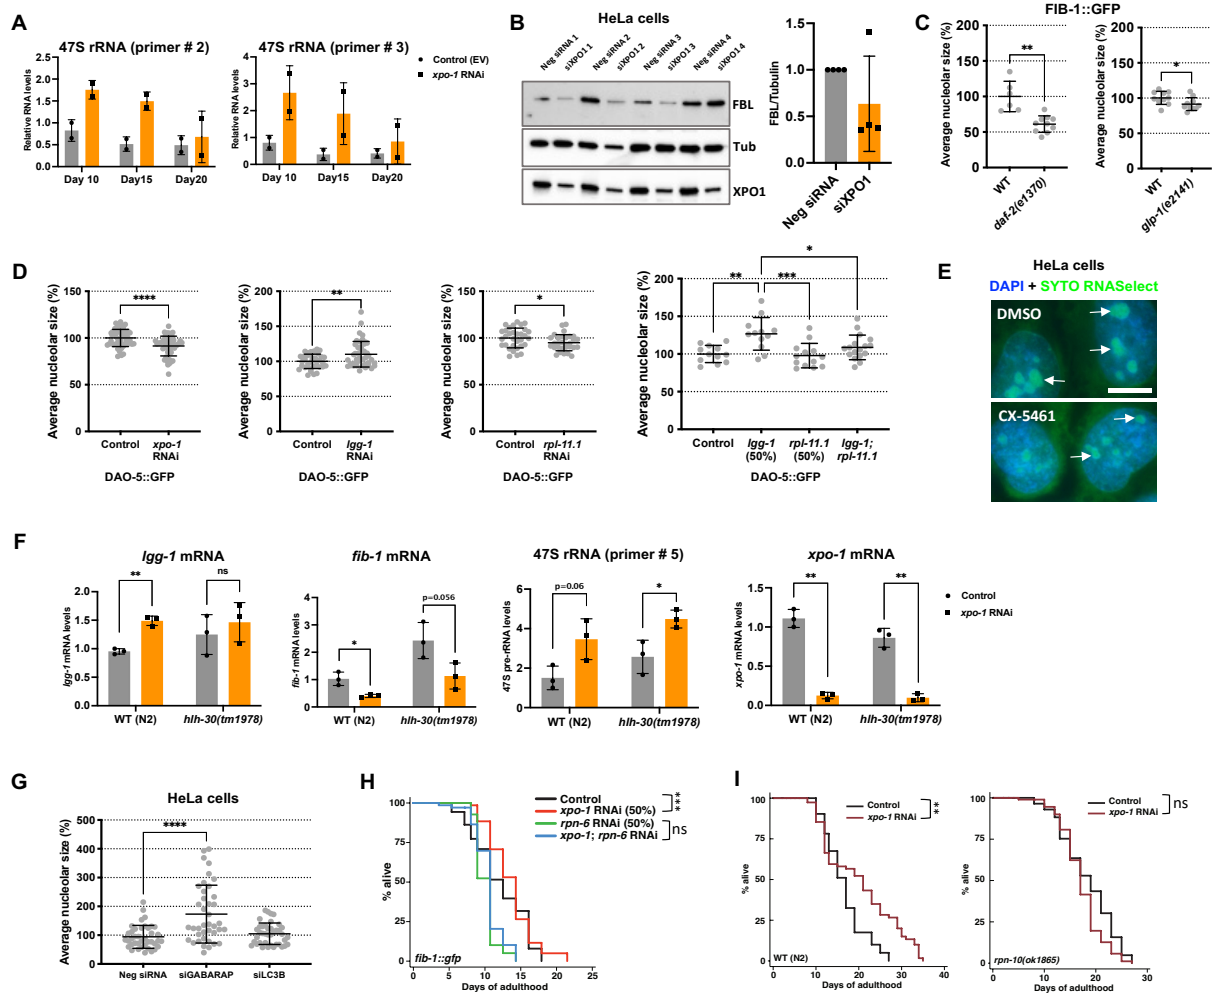

**Fig. S3. XPO-1 regulates nucleolar size**

(A) Expression of 47S pre-rRNA transcripts by qPCR in *xpo-1* RNAi compared to control using additional primers as confirmation (biological duplicates). See Supplementary table S6 for primer sequences. (B) FBL protein levels in HeLa cells treated with negative control or *xpo1* siRNA. Graph represents densitometry of the blot using Tubulin as the reference. (C) Average nucleolar size in *daf-2(e1370)* and *glp-1(e2141)* mutants expressing FIB-1::GFP. Nucleolar size was quantified on Day 1 of adulthood in *daf-2(e1370)* mutants raised at 15°C and *glp-1(e2141)* mutants raised at 25°C. (D) Average nucleolar size in nematodes expressing DAO-5::GFP subjected to *xpo-1*, *lgg-1*, *rpl-11.1*, or a combination of *lgg-1* and *rpl-11.1* RNAi for 48h from adulthood. (E) Nucleoli (arrows) stained using SYTO RNASelect in HeLa cells treated with RNA Polymerase I inhibitor, CX-5461 (1µM) or vehicle control (DMSO). Scale bar = 50µm. (F) RNA levels of *lgg-1*, *fib-1*, 47S rRNA, and *xpo-1* measured by qPCR in N2 wildtype and *hlh-30(tm1978)* null mutants upon control (L4440) or *xpo-1* RNAi from adulthood for 72h (biological triplicates). See Supplementary table S6 for primer sequences. (G) Average nucleolar size in HeLa cells treated with negative siRNA or siRNA to *gabarap* or *lc3* for 48h. (H) Lifespan analyses of *fib-1::gfp* nematodes on *xpo-1* and *rpn-6.1* RNAi alone or in combination compared to control. (I) Lifespan analyses of WT (N2) or *rpn-10(ok1865)* mutants on control or *xpo-1* RNAi from adulthood. \* $p < 0.05$ , \*\* $p < 0.01$ , \*\*\* $p < 0.001$ , \*\*\*\* $p < 0.0001$ , ns=not significant by Student's t test or ANOVA or Mantel-Cox log rank test for lifespan analyses. See Table S1 for lifespan statistics and repeats.

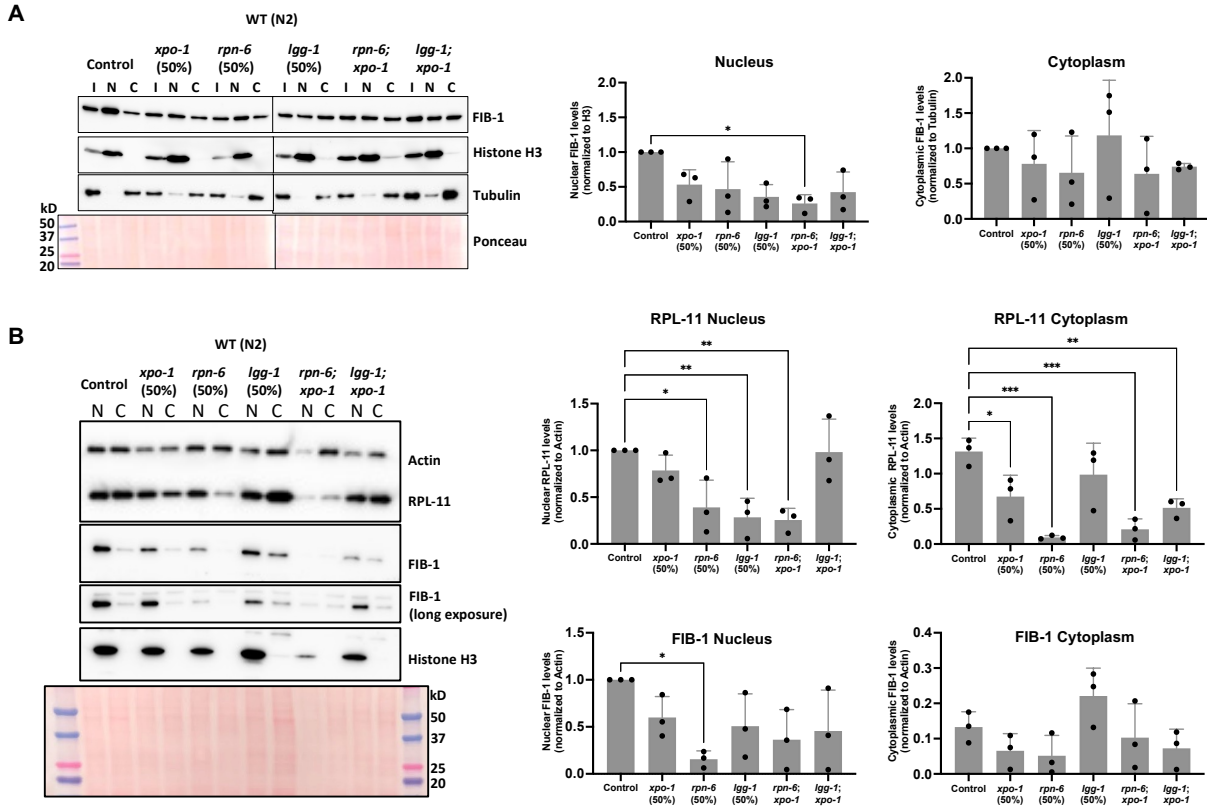

**Fig. S4. XPO-1 regulates ribosomal protein levels in an LGG-1-dependent manner**

(A) Representative blot showing FIB-1 protein levels in nuclear and cytoplasmic fractions of wildtype N2 worms upon various RNAi for 72h. Graphs represent densitometric quantification of FIB-1 in nuclear and cytoplasmic fractions using Histone H3 and Tubulin as references, respectively. (B) Representative blot showing RPL-11 and FIB-1 levels in nuclear and cytoplasmic fractions of wildtype N2 worms upon various RNAi for 72h. Graphs represent densitometric quantification of RPL-11 and FIB-1 levels in nuclear and cytoplasmic fractions normalized to Actin. Data are represented as mean  $\pm$  SD from three independent trials. I = Input, N = Nuclear, C = Cytoplasmic fractions, respectively. \* $p < 0.05$ , \*\* $p < 0.01$ , \*\*\* $p < 0.001$ , \*\*\*\* $p < 0.0001$  by one-way ANOVA

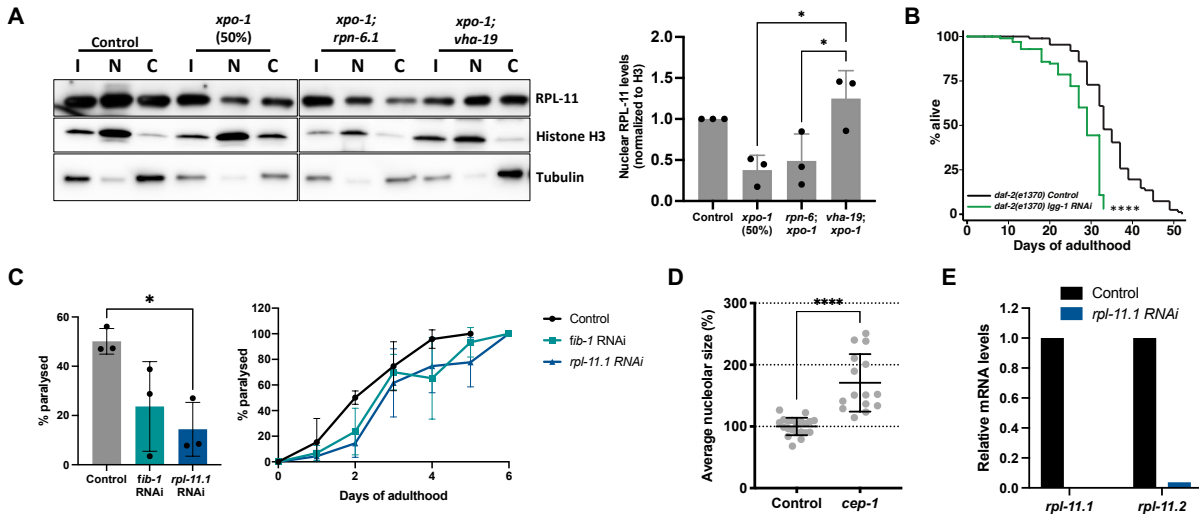

**Fig. S5. Lifespan, nucleolar size and proteostasis measurements**

(A) Representative blot for RPL-11 protein levels in input (I), nuclear (N), and cytoplasmic (C) fractions from wildtype N2 nematodes on control and various RNAi for 96h. Histone H3 and Tubulin were used as markers for nuclear and cytoplasmic fractions, respectively. Graph represents densitometric quantification of blots in nuclear fractions (normalized to Histone H3). (B) Lifespan analysis of *daf-2(e1370)* mutants upon *lgg-1* RNAi compared to control. (C) Paralysis assay in nematodes expressing heat-inducible A $\beta$  in muscles with *fib-1* and *rpl-11.1* RNAi compared to control. Graphs represent percent paralyzed worms after 48h or RNAi and through the entire time course. (D) Nucleolar size upon *cep-1* RNAi for 48h compared to control. Data are represented as mean  $\pm$  SD from three independent trials. (E) *rpl-11.1* and *rpl-11.2* mRNA levels upon *rpl-11.1* RNAi compared to control (technical triplicates). Data are represented as mean  $\pm$  SD. \* $p < 0.05$ , \*\* $p < 0.01$ , \*\*\* $p < 0.001$ , \*\*\*\* $p < 0.0001$  by Student's *t* test or ANOVA or Mantel-Cox log rank test for lifespan analyses. See Table S1 for lifespan statistics and repeats.

| Strain                    | Conditions           | Events Observed/N | Mean Lifespan | Maximum Lifespan | % Difference | P value |  |
|---------------------------|----------------------|-------------------|---------------|------------------|--------------|---------|--|
| N2                        | L4440                | 66/100            | 19.84         | 34               |              |         |  |
|                           | <i>xpo-1</i> (50%)   | 76/100            | 21.35         | 30               | 7.61         | 0.26    |  |
|                           | <i>rpn-6.1</i> (50%) | 82/100            | 13.46         | 16               | -32.16       | <0.001  |  |
|                           | <i>rpn-6;xpo-1</i>   | 83/100            | 13.75         | 18               | -30.70       | <0.001  |  |
|                           | <i>lgg-1</i> (50%)   | 71/100            | 16.74         | 24               | -15.63       | <0.001  |  |
|                           | <i>lgg-1,xpo-1</i>   | 88/100            | 17.92         | 26               | -9.68        | 0.0072  |  |
|                           |                      |                   |               |                  |              |         |  |
| N2                        | L4440                | 82/100            | 21.49         | 35               |              |         |  |
|                           | <i>xpo-1</i> (50%)   | 73/100            | 23.27         | 35               | 8.28         | 0.0231  |  |
|                           | <i>rpn-6.1</i> (50%) | 81/100            | 14.89         | 19               | -30.71       | <0.001  |  |
|                           | <i>rpn-6;xpo-1</i>   | 87/100            | 14.52         | 17               | -32.43       | <0.001  |  |
|                           | <i>lgg-1</i> (50%)   | 58/100            | 21.49         | 31               | 0.00         | 0.7176  |  |
|                           | <i>lgg-1,xpo-1</i>   | 84/100            | 17.32         | 23               | -19.40       | <0.001  |  |
|                           |                      |                   |               |                  |              |         |  |
| N2                        | L4440                | 44/100            | 14.51         | 25               |              |         |  |
|                           | <i>xpo-1</i> (50%)   | 46/100            | 21            | 29               | 44.73        | <0.001  |  |
|                           | <i>rpn-6.1</i> (50%) | 69/100            | 11.75         | 17               | -19.02       | <0.001  |  |
|                           | <i>rpn-6;xpo-1</i>   | 83/100            | 11.42         | 19               | -21.30       | <0.001  |  |
|                           | <i>lgg-1</i> (50%)   | 64/100            | 11.37         | 21               | -21.64       | <0.001  |  |
|                           | <i>lgg-1,xpo-1</i>   | 70/100            | 17.81         | 23               | 22.74        | <0.001  |  |
|                           |                      |                   |               |                  |              |         |  |
| <i>pfib-1::fib-1::gfp</i> | L4440                | 37/80             | 13.72         | 26               |              |         |  |
|                           | <i>xpo-1</i>         | 44/80             | 19.48         | 32               | 41.98        | 0.0001  |  |
|                           |                      |                   |               |                  |              |         |  |
| <i>pfib-1::fib-1::gfp</i> | L4440                | 47/100            | 15.84         | 29               |              |         |  |
|                           | <i>xpo-1</i>         | 44/100            | 18.45         | 32               | 16.48        | 0.0327  |  |
|                           |                      |                   |               |                  |              |         |  |
| <i>pfib-1::fib-1::gfp</i> | L4440                | 36/100            | 12.95         | 25               |              |         |  |
|                           | <i>xpo-1</i>         | 37/100            | 22.42         | 39               | 73.13        | <0.001  |  |
|                           |                      |                   |               |                  |              |         |  |
| <i>pfib-1::fib-1::gfp</i> | L4440                | 30/100            | 13.55         | 20               |              |         |  |
|                           | <i>xpo-1</i>         | 59/100            | 15.21         | 28               | 12.25        | 0.1768  |  |
|                           |                      |                   |               |                  |              |         |  |
| <i>pfib-1::fib-1::gfp</i> | L4440                | 47/100            | 15.84         | 29               |              |         |  |
|                           | <i>xpo-1</i> (50%)   | 49/100            | 21.61         | 40               | 36.43        | 0.0001  |  |

|                                        |                      |        |          |       |        |         |                                               |
|----------------------------------------|----------------------|--------|----------|-------|--------|---------|-----------------------------------------------|
|                                        | <i>rpn-6.1</i> (50%) | 59/100 | 13.2     | 19    | -16.67 | <0.0001 |                                               |
|                                        | <i>rpn-6;xpo-1</i>   | 61/100 | 13.63    | 17    | -13.95 | <0.0001 |                                               |
|                                        |                      |        |          |       |        |         |                                               |
| <i>pfib-1::fib-1::gfp</i>              | L4440                | 36/100 | 12.95    | 25    |        |         |                                               |
|                                        | <i>xpo-1</i> (50%)   | 34/100 | 20.32    | 39    | 56.91  | <0.001  |                                               |
|                                        | <i>rpn-6.1</i> (50%) | 45/100 | 13.39    | 18    | 3.40   | 0.662   |                                               |
|                                        | <i>rpn-6;xpo-1</i>   | 48/100 | 13.75    | 18    | 6.18   | 0.1883  |                                               |
|                                        |                      |        |          |       |        |         |                                               |
| <i>ncl-1(e1942);pfib-1::fib-1::gfp</i> | L4440                | 48/100 | 15.06    | 28    |        |         |                                               |
|                                        | <i>xpo-1</i>         | 65/100 | 12.52    | 25    | -16.87 | 0.0016  |                                               |
|                                        |                      |        |          |       |        |         |                                               |
| <i>ncl-1(e1942);pfib-1::fib-1::gfp</i> | L4440                | 51/100 | 14.87    | 27    |        |         |                                               |
|                                        | <i>xpo-1</i>         | 64/100 | 12.96    | 27    | -12.84 | 0.0194  |                                               |
|                                        |                      |        |          |       |        |         |                                               |
| <i>ncl-1(e1942);pfib-1::fib-1::gfp</i> | L4440                | 50/100 | 17.97    | 26    |        |         |                                               |
|                                        | <i>xpo-1</i>         | 67/100 | 13.79    | 20    | -23.26 | <0.001  |                                               |
|                                        |                      |        |          |       |        |         |                                               |
| N2                                     | 25°C                 | 78/100 | 10.33618 | 21    |        |         |                                               |
| <i>plgg-1::gfp::lgg-1</i>              | 25°C                 | 85/100 | 10.47973 | 20    | 1.39   | 0.5635  | with respect to N2                            |
| <i>daf-2(e1370)</i>                    | 25°C                 | 92/100 | 29.43    | 55    |        |         |                                               |
| <i>daf-2(e1370);plgg-1::gfp::lgg-1</i> | 25°C                 | 93/100 | 35.36    | 55    | 20.15  | <0.001  | with respect to <i>daf-2</i> ( <i>e1370</i> ) |
|                                        |                      |        |          |       |        |         |                                               |
| N2                                     | 25°C                 | 84/100 | 10.18    | 20    |        |         |                                               |
| <i>plgg-1::gfp::lgg-1</i>              | 25°C                 | 95/100 | 11.25    | 19    | 10.51  | 0.058   | with respect to N2                            |
| <i>daf-2(e1370)</i>                    | 25°C                 | 84/100 | 28.37    | 47    |        |         |                                               |
| <i>daf-2(e1370);plgg-1::gfp::lgg-1</i> | 25°C                 | 96/100 | 39.3     | 55    | 38.53  | <0.001  | with respect to <i>daf-2</i> ( <i>e1370</i> ) |
|                                        |                      |        |          |       |        |         |                                               |
| N2                                     | 25°C                 | 79/100 | 10.89    | 14    |        |         |                                               |
| <i>plgg-1::gfp::lgg-1</i>              | 25°C                 | 88/100 | 11.85    | 21.00 | 8.82   | 0.0019  | with respect to N2                            |
| <i>daf-2(e1370)</i>                    | 25°C                 | 86/100 | 25.11    | 46    |        |         |                                               |
| <i>daf-2(e1370);plgg-1::gfp::lgg-1</i> | 25°C                 | 92/100 | 31.49    | 46    | 25.41  | <0.001  | with respect to <i>daf-2</i> ( <i>e1370</i> ) |
|                                        |                      |        |          |       |        |         |                                               |
| <i>daf-2(e1370)</i>                    | 25°C                 | 83/100 | 34.7     | 52    |        |         |                                               |
|                                        | 25°C, <i>lgg-1</i>   | 80/100 | 27.69    | 33    | -20.20 | <0.0001 |                                               |



|                       |                    |        |          |    |            |        |  |
|-----------------------|--------------------|--------|----------|----|------------|--------|--|
| <i>daf-2(e1370)</i>   | 25°C               | 29/80  | 35.01968 | 57 |            |        |  |
|                       | 25°C, <i>lgg-1</i> | 64/80  | 32.28013 | 43 | -7.82      | 0.0561 |  |
|                       |                    |        |          |    |            |        |  |
| <i>daf-2(e1370)</i>   | 25°C               | 87/100 | 23.7     | 40 |            |        |  |
|                       | 25°C, <i>lgg-1</i> | 83/100 | 27.35    | 34 | 15.40      | 0.0025 |  |
|                       |                    |        |          |    |            |        |  |
| N2                    | L4440              | 65/100 | 16.41    | 26 |            |        |  |
|                       | <i>xpo-1</i>       | 77/100 | 18.6     | 27 | 13.34      | 0.0026 |  |
|                       |                    |        |          |    |            |        |  |
| N2                    | L4440              | 49/100 | 16.61    | 27 |            |        |  |
|                       | <i>xpo-1</i>       | 67/100 | 20.24    | 35 | 21.8543046 | 0.0043 |  |
|                       |                    |        |          |    |            |        |  |
| <i>rpn-10(ok1865)</i> | L4440              | 77/100 | 16.84    | 22 |            |        |  |
|                       | <i>xpo-1</i>       | 87/100 | 16.12    | 24 | -4.27      | 0.4894 |  |
|                       |                    |        |          |    |            |        |  |
| <i>rpn-10(ok1865)</i> | L4440              | 84/100 | 18.39    | 27 |            |        |  |
|                       | <i>xpo-1</i>       | 87/100 | 17.21    | 27 | -6.4165307 | 0.0173 |  |

**Table S1. Details of survival analyses performed in the study**

| <b>Strains used in this study</b> |                                                                                                                        |
|-----------------------------------|------------------------------------------------------------------------------------------------------------------------|
| N2                                | Wild-type (Kenyon lab - CF)                                                                                            |
| LRL103                            | ptnIs001 [ <i>Pfib-1::fib-1::gfp</i> fosmid::cbunc-119(+)]; <i>unc-119(ed3)</i> ] (Ref. 25) outcrossed with N2 3 times |
| CF2218                            | <i>ncl-1(e1942) III</i>                                                                                                |
| LRL78                             | <i>ncl-1(e1942) III</i> ; ptnIs001 [ <i>Pfib-1::fib-1::gfp</i> fosmid::cbunc-119(+)]; <i>unc-119(ed3)</i> ]            |
| CF1041                            | <i>daf-2(e1370) III</i>                                                                                                |
| MAH14                             | <i>daf-2(e1370) III</i> ; adIs2122 [ <i>lgg-1::gfp</i> + <i>rol-6(su1006)</i> ]                                        |
| DA2123                            | adIs2122 [ <i>lgg-1p::gfp::lgg-1</i> + <i>rol-6(su1006)</i> ]                                                          |
| LRL41                             | GMC101 (dvIs100 [ <i>unc-54p::A-beta-1-42::unc-54</i> 3'-UTR + <i>mtl-2p::gfp</i> ]) outcrossed with N2 4 times        |
| LRL31                             | FX1978 [ <i>hlh-30(tm1978)</i> ] outcrossed with N2 4 times                                                            |
| VC1369                            | <i>rpn-10(ok1865)</i>                                                                                                  |
| CPB089                            | <i>ptnIs050 (dao-5::gfp)</i>                                                                                           |

**Table S2. List of *C. elegans* strains used in the study**

| Gene                | Primer Sequence           | Reference |
|---------------------|---------------------------|-----------|
| 47S pre rRNA (F) #5 | CTTCACGGACATGCGGTGAT      | 70        |
| 47S pre rRNA (R) #5 | TGTGATGCTTCTGGACTAGG      |           |
| 47S pre rRNA (F) #2 | GATCCATAGATATTGCTGATGATTC | 24        |
| 47S pre rRNA (R) #2 | CGCAGACATATAGTCTAGCGAG    |           |
| 47S pre rRNA (F) #3 | AATACTGGGATTCGTCTA        |           |
| 47S pre rRNA (R) #3 | GAGTTCAGGTTGAGATTAG       |           |
| <i>fib-1</i> (F)    | TGCTTGTCGGAATGGTCGAT      |           |
| <i>fib-1</i> (R)    | TCTCTCATAACGGCTCCAGGG     |           |
| <i>lgg-1</i> (F)    | ACCCAGACCGTATTCCAGTG      | 14        |
| <i>lgg-1</i> (R)    | ACGAAGTTGGATGCGTTTTTC     |           |
| <i>pmp-3</i> (F)    | GTTCCCGTGTTCATCACTCAT     |           |
| <i>pmp-3</i> (R)    | ACACCGTCGAGAAGCTGTAGA     |           |
| <i>rpl-11.1</i> (F) | ACGGACGTCGAAAAACAGAC      |           |
| <i>rpl-11.1</i> (R) | GCTCGAGCACCTTAGCG         |           |
| <i>rpl-11.2</i> (F) | GATTCGGAGTCCAGGAGCAC      |           |
| <i>rpl-11.2</i> (R) | TCTTCTTTGGCGATACGGC       |           |

**Table S3. List of qPCR primers used in the study**

| <b>Antibodies</b>                 | <b>Application</b>  | <b>Source</b>                     |
|-----------------------------------|---------------------|-----------------------------------|
| Fibrillarin                       | Western blot        | Novus Bio. NB300-269              |
| RPL11                             | Western blot        | Proteintech 16277-1-AP            |
| Histone H3                        | Western blot        | Abcam ab1791                      |
| Tubulin                           | Western blot        | Abcam ab6160                      |
| XPO1                              | Western blot        | Santa Cruz Biotechnology sc-74454 |
| GFP                               | Western blot        | Santa Cruz Biotechnology sc-9996  |
| GFP                               | Immunoprecipitation | Proteintech 50430-2-AP            |
| IgG Control                       | Immunoprecipitation | Proteintech 30000-0-AP            |
| HRP Goat Anti-Mouse               | Western blot        | Li-Cor 926-80010                  |
| HRP Goat Anti-Rabbit              | Western blot        | Li-Cor 926-80011                  |
| HRP Goat Anti-Rat                 | Western blot        | Life Technologies 31470           |
| VeriBlot IP Detection Reagent HRP | Western blot        | Abcam ab131366                    |

**Table S4. List of antibodies used in the study**

**Data S1. (separate file)**

List of all differentially regulated transcripts with false discovery rate <0.05 and fold change >1.5 fold obtained by mRNA sequencing from *xpo-1* RNAi nematodes compared to control

**Data S2. (separate file)**

List of all nuclear and cytoplasmic repartitioned proteins upon *xpo-1* RNAi compared to control identified using TMT-MS analysis and repartitioned proteins that were also earlier found to be XPO1 cargo (15)

**Data S3. (separate file)**

List of all transcripts with altered translation efficiency upon *xpo-1* RNAi compared to control

**Data S4. (separate file)**

List of all transcripts uniquely altered only in polysome fractions upon *xpo-1* RNAi compared to control

## REFERENCES AND NOTES

1. A. Komeili, E. K. O'Shea, New perspectives on nuclear transport. *Annu. Rev. Genet.* **35**, 341–364 (2001).
2. T. Guttler, D. Gorlich, Ran-dependent nuclear export mediators: A structural perspective. *EMBO J.* **30**, 3457–3474 (2011).
3. D. Xu, A. Farmer, G. Collett, N. V. Grishin, Y. M. Chook, Sequence and structural analyses of nuclear export signals in the NESdb database. *Mol. Biol. Cell* **23**, 3677–3693 (2012).
4. K. Thakar, S. Karaca, S. A. Port, H. Urlaub, R. H. Kehlenbach, Identification of CRM1-dependent nuclear export cargos using quantitative mass spectrometry. *Mol. Cell. Proteomics* **12**, 664–678 (2013).
5. S. Francisco, M. Ferreira, G. Moura, A. R. Soares, M. A. S. Santos, Does proteostasis get lost in translation? Implications for protein aggregation across the lifespan. *Ageing Res. Rev.* **62**, 101119 (2020).
6. A. Chiocchetti, J. Zhou, H. Zhu, T. Karl, O. Haubenreisser, M. Rinnerthaler, G. Heeren, K. Oender, J. Bauer, H. Hintner, M. Breitenbach, L. Breitenbach-Koller, Ribosomal proteins Rpl10 and Rps6 are potent regulators of yeast replicative life span. *Exp. Gerontol.* **42**, 275–286 (2007).
7. M. Hansen, S. Taubert, D. Crawford, N. Libina, S. J. Lee, C. Kenyon, Lifespan extension by conditions that inhibit translation in *Caenorhabditis elegans*. *Aging Cell* **6**, 95–110 (2007).
8. K. Z. Pan, J. E. Palter, A. N. Rogers, A. Olsen, D. Chen, G. J. Lithgow, P. Kapahi, Inhibition of mRNA translation extends lifespan in *Caenorhabditis elegans*. *Aging Cell* **6**, 111–119 (2007).
9. A. R. Hipkiss, On why decreasing protein synthesis can increase lifespan. *Mech. Ageing Dev.* **128**, 412–414 (2007).
10. T. von der Haar, J. E. Leadsham, A. Sauvadet, D. Tarrant, I. S. Adam, K. Saromi, P. Laun, M. Rinnerthaler, H. Breitenbach-Koller, M. Breitenbach, M. F. Tuite, C. W. Gourelay, The control of translational accuracy is a determinant of healthy ageing in yeast. *Open Biol.* **7**, 160291 (2017).

11. J. Xie, V. de Souza Alves, T. von der Haar, L. O'Keefe, R. V. Lenchine, K. B. Jensen, R. Liu, M. J. Coldwell, X. Wang, C. G. Proud, Regulation of the elongation phase of protein synthesis enhances translation accuracy and modulates lifespan. *Curr. Biol.* **29**, 737–749.e5 (2019).
12. K. K. Steffen, A. Dillin, A ribosomal perspective on proteostasis and aging. *Cell Metab.* **23**, 1004–1012 (2016).
13. M. J. Silvestrini, J. R. Johnson, A. V. Kumar, T. G. Thakurta, K. Blais, Z. A. Neill, S. W. Marion, V. St Amand, R. A. Reenan, L. R. Lapierre, Nuclear export inhibition enhances HLH-30/TFEB activity, autophagy, and lifespan. *Cell Rep.* **23**, 1915–1921 (2018).
14. L. R. Lapierre, C. D. De Magalhaes Filho, P. R. McQuary, C. C. Chu, O. Visvikis, J. T. Chang, S. Gelino, B. Ong, A. E. Davis, J. E. Irazoqui, A. Dillin, M. Hansen, The TFEB orthologue HLH-30 regulates autophagy and modulates longevity in *Caenorhabditis elegans*. *Nat. Commun.* **4**, 2267 (2013).
15. K. Kirli, S. Karaca, H. J. Dehne, M. Samwer, K. T. Pan, C. Lenz, H. Urlaub, D. Gorlich, A deep proteomics perspective on CRM1-mediated nuclear export and nucleocytoplasmic partitioning. *eLife* **4**, (2015).
16. A. D. Holdorf, D. P. Higgins, A. C. Hart, P. R. Boag, G. J. Pazour, A. J. M. Walhout, A. K. Walker, WormCat: An online tool for annotation and visualization of *Caenorhabditis elegans* genome-scale data. *Genetics* **214**, 279–294 (2020).
17. M. M. Senchuk, D. J. Dues, C. E. Schaar, B. K. Johnson, Z. B. Madaj, M. J. Bowman, M. E. Winn, J. M. Van Raamsdonk, Activation of DAF-16/FOXO by reactive oxygen species contributes to longevity in long-lived mitochondrial mutants in *Caenorhabditis elegans*. *PLOS Genet.* **14**, e1007268 (2018).
18. B. N. Heestand, Y. Shen, W. Liu, D. B. Magner, N. Storm, C. Meharg, B. Habermann, A. Antebi, Dietary restriction induced longevity is mediated by nuclear receptor NHR-62 in *Caenorhabditis elegans*. *PLOS Genet.* **9**, e1003651 (2013).
19. A. N. Rogers, D. Chen, G. McColl, G. Czerwieniec, K. Felkey, B. W. Gibson, A. Hubbard, S. Melov, G. J. Lithgow, P. Kapahi, Life span extension via eIF4G inhibition is mediated by posttranscriptional remodeling of stress response gene expression in *C. elegans*. *Cell Metab.* **14**, 55–66 (2011).

20. B. M. Zid, A. N. Rogers, S. D. Katewa, M. A. Vargas, M. C. Kolipinski, T. A. Lu, S. Benzer, P. Kapahi, 4E-BP extends lifespan upon dietary restriction by enhancing mitochondrial activity in *Drosophila*. *Cell* **139**, 149–160 (2009).
21. R. Tacutu, D. Thornton, E. Johnson, A. Budovsky, D. Barardo, T. Craig, E. Diana, G. Lehmann, D. Toren, J. Wang, V. E. Fraifeld, J. P. de Magalhaes, Human ageing genomic resources: New and updated databases. *Nucleic Acids Res.* **46**, D1083–D1090 (2018).
22. I. Grummt, The nucleolus-guardian of cellular homeostasis and genome integrity. *Chromosoma* **122**, 487–497 (2013).
23. V. Tiku, C. Jain, Y. Raz, S. Nakamura, B. Heestand, W. Liu, M. Spath, H. E. D. Suchiman, R. U. Muller, P. E. Slagboom, L. Partridge, A. Antebi, Small nucleoli are a cellular hallmark of longevity. *Nat. Commun.* **8**, 16083 (2017).
24. V. Tiku, C. Kew, P. Mehrotra, R. Ganesan, N. Robinson, A. Antebi, Nucleolar fibrillarin is an evolutionarily conserved regulator of bacterial pathogen resistance. *Nat. Commun.* **9**, 3607 (2018).
25. D. Tollervy, H. Lehtonen, R. Jansen, H. Kern, E. C. Hurt, Temperature-sensitive mutations demonstrate roles for yeast fibrillarin in pre-rRNA processing, pre-rRNA methylation, and ribosome assembly. *Cell* **72**, 443–457 (1993).
26. S. C. Weber, C. P. Brangwynne, Inverse size scaling of the nucleolus by a concentration-dependent phase transition. *Curr. Biol.* **25**, 641–646 (2015).
27. J. Berry, S. C. Weber, N. Vaidya, M. Haataja, C. P. Brangwynne, RNA transcription modulates phase transition-driven nuclear body assembly. *Proc. Natl. Acad. Sci. U.S.A.* **112**, E5237–E5245 (2015).
28. D. Drygin, A. Lin, J. Bliesath, C. B. Ho, S. E. O'Brien, C. Proffitt, M. Omori, M. Haddach, M. K. Schwaebe, A. Siddiqui-Jain, N. Streiner, J. E. Quin, E. Sanij, M. J. Bywater, R. D. Hannan, D. Ryckman, K. Anderes, W. G. Rice, Targeting RNA polymerase I with an oral small molecule CX-5461 inhibits ribosomal RNA synthesis and solid tumor growth. *Cancer Res.* **71**, 1418–1430 (2011).

29. J. Labbadia, R. I. Morimoto, Proteostasis and longevity: When does aging really begin? *F1000Prime Rep.* **6**, 7 (2014).
30. A. Meléndez, Z. Tallóczy, M. Seaman, E. L. Eskelinen, D. H. Hall, B. Levine, Autophagy genes are essential for dauer development and life-span extension in *C. elegans*. *Science* **301**, 1387–1391 (2003).
31. M. Manil-Segalen, E. Culetto, R. Legouis, C. Lefebvre, Interactions between endosomal maturation and autophagy: Analysis of ESCRT machinery during *Caenorhabditis elegans* development. *Methods Enzymol.* **534**, 93–118 (2014).
32. I. Saez, D. Vilchez, The mechanistic links between proteasome activity, aging and age-related diseases, *Curr. Genomics* **15**, 38–51 (2014).
33. S. A. Keith, S. K. Maddux, Y. Zhong, M. N. Chinchankar, A. A. Ferguson, A. Ghazi, A. L. Fisher, Graded proteasome dysfunction in *Caenorhabditis elegans* activates an adaptive response involving the conserved SKN-1 and ELT-2 transcription factors and the autophagy-lysosome pathway. *PLOS Genet.* **12**, e1005823 (2016).
34. Y. H. Yi, T. H. Ma, L. W. Lee, P. T. Chiou, P. H. Chen, C. M. Lee, Y. D. Chu, H. Yu, K. C. Hsiung, Y. T. Tsai, C. C. Lee, Y. S. Chang, S. P. Chan, B. C. Tan, S. J. Lo, A genetic cascade of *let-7-ncl-1-fib-1* modulates nucleolar size and rRNA pool in *Caenorhabditis elegans*. *PLOS Genet.* **11**, e1005580 (2015).
35. Y. W. Lam, A. I. Lamond, M. Mann, J. S. Andersen, Analysis of nucleolar protein dynamics reveals the nuclear degradation of ribosomal proteins. *Curr. Biol.* **17**, 749–760 (2007).
36. E. Nicolas, P. Parisot, C. Pinto-Monteiro, R. de Walque, C. De Vleeschouwer, D. L. J. Lafontaine, Involvement of human ribosomal proteins in nucleolar structure and p53-dependent nucleolar stress. *Nat. Commun.* **7**, 11390 (2016).
37. A. Sundqvist, G. Liu, A. Mirsaliotis, D. P. Xirodimas, Regulation of nucleolar signalling to p53 through NEDDylation of L11. *EMBO Rep.* **10**, 1132–1139 (2009).
38. Y. Liu, C. Deisenroth, Y. Zhang, RP-MDM2-p53 pathway: Linking ribosomal biogenesis and tumor surveillance. *Trends Cancer* **2**, 191–204 (2016).



39. M. L. Toth, T. Sigmond, E. Borsos, J. Barna, P. Erdelyi, K. Takacs-Vellai, L. Orosz, A. L. Kovacs, G. Csikos, M. Sass, T. Vellai, Longevity pathways converge on autophagy genes to regulate life span in *Caenorhabditis elegans*. *Autophagy* **4**, 330–338 (2008).
40. G. McColl, B. R. Roberts, T. L. Pukala, V. B. Kenche, C. M. Roberts, C. D. Link, T. M. Ryan, C. L. Masters, K. J. Barnham, A. I. Bush, R. A. Cherny, Utility of an improved model of amyloid-beta ( $A\beta_{1-42}$ ) toxicity in *Caenorhabditis elegans* for drug screening for Alzheimer's disease. *Mol. Neurodegener.* **7**, 57 (2012).
41. I. Seim, S. Ma, V. N. Gladyshev, Gene expression signatures of human cell and tissue longevity. *NPJ Aging Mech. Dis.* **2**, 16014 (2016).
42. A. W. Gao, R. L. Smith, M. van Weeghel, R. Kamble, G. E. Janssens, R. H. Houtkooper, Identification of key pathways and metabolic fingerprints of longevity in *C. elegans*. *Exp. Gerontol.* **113**, 128–140 (2018).
43. F. J. Iborra, D. A. Jackson, P. R. Cook, The case for nuclear translation. *J. Cell Sci.* **117**, 5713–5720 (2004).
44. D. W. Reid, C. V. Nicchitta, The enduring enigma of nuclear translation. *J. Cell Biol.* **197**, 7–9 (2012).
45. D. M. Waldera-Lupa, F. Kalfalah, A. M. Florea, S. Sass, F. Kruse, V. Rieder, J. Tigges, E. Fritsche, J. Krutmann, H. Busch, M. Boerries, H. E. Meyer, F. Boege, F. Theis, G. Reifenberger, K. Stuhler, Proteome-wide analysis reveals an age-associated cellular phenotype of in situ aged human fibroblasts. *Aging* **6**, 856–878 (2014).
46. A. Buchwalter, M. W. Hetzer, Nucleolar expansion and elevated protein translation in premature aging. *Nat. Commun.* **8**, 328 (2017).
47. M. Derenzini, D. Trerè, A. Pession, M. Govoni, V. Sirri, P. Chieco, Nucleolar size indicates the rapidity of cell proliferation in cancer tissues. *J. Pathol.* **191**, 181–186 (2000).

48. K. Nishimura, T. Kumazawa, T. Kuroda, N. Katagiri, M. Tsuchiya, N. Goto, R. Furumai, A. Murayama, J. Yanagisawa, K. Kimura, Perturbation of ribosome biogenesis drives cells into senescence through 5S RNP-mediated p53 activation. *Cell Rep.* **10**, 1310–1323 (2015).
49. J. M. Stommel, N. D. Marchenko, G. S. Jimenez, U. M. Moll, T. J. Hope, G. M. Wahl, A leucine-rich nuclear export signal in the p53 tetramerization domain: Regulation of subcellular localization and p53 activity by NES masking. *EMBO J.* **18**, 1660–1672 (1999).
50. D. Xu, N. V. Grishin, Y. M. Chook, NESdb: A database of NES-containing CRM1 cargoes. *Mol. Biol. Cell* **23**, 3673–3676 (2012).
51. I. Topisirovic, N. Siddiqui, V. L. Lapointe, M. Trost, P. Thibault, C. Bangeranye, S. Pinol-Roma, K. L. Borden, Molecular dissection of the eukaryotic initiation factor 4E (eIF4E) export-competent RNP. *EMBO J.* **28**, 1087–1098 (2009).
52. I. Schlosser, M. Holzel, M. Murnseer, H. Burtscher, U. H. Weidle, D. Eick, A role for c-Myc in the regulation of ribosomal RNA processing. *Nucleic Acids Res.* **31**, 6148–6156 (2003).
53. J. Eroles, V. Marchand, B. Panthu, S. Gillot, S. Belin, S. E. Ghayad, M. Garcia, F. Laforets, V. Marcel, A. Baudin-Baillieu, P. Bertin, Y. Coute, A. Adrait, M. Meyer, G. Therizols, M. Yusupov, O. Namy, T. Ohlmann, Y. Motorin, F. Catez, J. J. Diaz, Evidence for rRNA 2'-O-methylation plasticity: Control of intrinsic translational capabilities of human ribosomes. *Proc. Natl. Acad. Sci. U.S.A.* **114**, 12934–12939 (2017).
54. R. Huang, Y. Xu, W. Wan, X. Shou, J. Qian, Z. You, B. Liu, C. Chang, T. Zhou, J. Lippincott-Schwartz, W. Liu, Deacetylation of nuclear LC3 drives autophagy initiation under starvation. *Mol. Cell* **57**, 456–466 (2015).
55. L. J. Kraft, P. Manral, J. Dowler, A. K. Kenworthy, Nuclear LC3 associates with slowly diffusing complexes that survey the nucleolus. *Traffic* **17**, 369–399 (2016).
56. K. R. Kampen, S. O. Sulima, S. Vereecke, K. De Keersmaecker, Hallmarks of ribosomopathies. *Nucleic Acids Res.* **48**, 1013–1028 (2020).

57. I. Boria, E. Garelli, H. T. Gazda, A. Aspesi, P. Quarello, E. Pavesi, D. Ferrante, J. J. Meerpohl, M. Kartal, L. Da Costa, A. Proust, T. Leblanc, M. Simansour, N. Dahl, A. S. Frojmark, D. Pospisilova, R. Cmejla, A. H. Beggs, M. R. Sheen, M. Landowski, C. M. Buros, C. M. Clinton, L. J. Dobson, A. Vlachos, E. Atsidaftos, J. M. Lipton, S. R. Ellis, U. Ramenghi, I. Dianzani, The ribosomal basis of Diamond-Blackfan anemia: Mutation and database update. *Hum. Mutat.* **31**, 1269–1279 (2010).
58. W. Y. Huang, L. Yue, W. S. Qiu, L. W. Wang, X. H. Zhou, Y. J. Sun, Prognostic value of CRM1 in pancreas cancer. *Clin. Invest. Med.* **32**, E315 (2009).
59. F. Zhou, W. Qiu, R. Yao, J. Xiang, X. Sun, S. Liu, J. Lv, L. Yue, CRM1 is a novel independent prognostic factor for the poor prognosis of gastric carcinomas. *Med. Oncol.* **30**, 726 (2013).
60. U. H. Gandhi, W. Senapedis, E. Baloglu, T. J. Unger, A. Chari, D. Vogl, R. F. Cornell, Clinical implications of targeting XPO1-mediated nuclear export in multiple myeloma. *Clin. Lymphoma Myeloma Leuk.* **18**, 335–345 (2018).
61. A. Wahba, B. H. Rath, J. W. O'Neill, K. Camphausen, P. J. Tofilon, The XPO1 inhibitor selinexor inhibits translation and enhances the radiosensitivity of glioblastoma cells grown in vitro and in vivo. *Mol. Cancer Ther.* **17**, 1717–1726 (2018).
62. A. V. Kumar, T. G. Thakurta, M. J. Silvestrini, J. R. Johnson, R. A. Reenan, L. R. Lapierre, Give me a SINE: How selective inhibitors of nuclear export modulate autophagy and aging. *Mol. Cell. Oncol.* **5**, e1502511 (2018).
63. S. Brenner, The genetics of *Caenorhabditis elegans*. *Genetics* **77**, 71–94 (1974).
64. R. S. Kamath, J. Ahringer, Genome-wide RNAi screening in *Caenorhabditis elegans*. *Methods* **30**, 313–321 (2003).
65. J. Maciejowski, J. H. Ahn, P. G. Cipriani, D. J. Killian, A. L. Chaudhary, J. I. Lee, R. Voutev, R. C. Johnsen, D. L. Baillie, K. C. Gunsalus, D. H. Fitch, E. J. Hubbard, Autosomal genes of autosomal/X-linked duplicated gene pairs and germ-line proliferation in *Caenorhabditis elegans*. *Genetics* **169**, 1997–2011 (2005).

66. S. X. Ge, E. W. Son, R. Yao, iDEP: An integrated web application for differential expression and pathway analysis of RNA-Seq data. *BMC Bioinformatics* **19**, 534 (2018).
67. T. Kang, B. B. Boland, P. Jensen, C. Alarcon, A. Nawrocki, J. S. Grimsby, C. J. Rhodes, M. R. Larsen, Characterization of signaling pathways associated with pancreatic  $\beta$ -cell adaptive flexibility in compensation of obesity-linked diabetes in db/db mice. *Mol. Cell. Proteomics* **19**, 971–993 (2020).
68. T. Kang, P. Jensen, V. Solovyeva, J. R. Brewer, M. R. Larsen, Dynamic changes in the protein localization in the nuclear environment in pancreatic  $\beta$ -cell after brief glucose stimulation. *J. Proteome Res.* **17**, 1664–1676 (2018).
69. M. Molenaars, G. E. Janssens, E. G. Williams, A. Jongejan, J. Lan, S. Rabot, F. Joly, P. D. Moerland, B. V. Schomakers, M. Lezzerini, Y. J. Liu, M. A. McCormick, B. K. Kennedy, M. van Weeghel, A. H. C. van Kampen, R. Aebersold, A. W. MacInnes, R. H. Houtkooper, A conserved mito-cytosolic translational balance links two longevity pathways. *Cell Metab.* **31**, 549–563.e547 (2020).
70. J. Wu, X. Jiang, Y. Li, T. Zhu, J. Zhang, Z. Zhang, L. Zhang, Y. Zhang, Y. Wang, X. Zou, B. Liang, PHA-4/FoxA senses nucleolar stress to regulate lipid accumulation in *Caenorhabditis elegans*. *Nat. Commun.* **9**, 1195 (2018).
